# Supplementary material for: The Role of Macrophage-Inducible C-Type Lectin in Different Stages of Chronic Liver Disease
Source: Front Immunol. 2020 Jul 7;11:1352. doi: 10.3389/fimmu.2020.01352 (PMC7358277; doi:10.3389/fimmu.2020.01352)
Supplement: Supplementary file 1 [file Data_Sheet_1.docx]

**The role of macrophage-inducible C-type lectin in different stages of chronic liver disease**

Robert Schierwagen 1, Frank E. Uschner 1, Cristina Ortiz 1, Sandra Torres 1, Max J. Brol 2, Olaf Tyc 1, Wenyi Gu 1, Christian Grimm 1, Stefan Zeuzem 1, Andreas Plamper 3, Philipp Pfeifer 4, Sebastian Zimmer 4, Christoph Welsch 1, Liliana Schaefer 5, Karl P. Rheinwalt 3, Joan Clària 6, Vicente Arroyo 6, Jonel Trebicka 1,6,7,8, Sabine Klein 1

**Affiliations:**

1 Department of Internal Medicine I, University Hospital, Goethe University, Frankfurt, Germany

2 Department of Internal Medicine I, University of Bonn, Bonn, Germany

3 Department for Bariatric, Metabolic and Plastic Surgery, St. Franziskus-Hospital, Cologne, Germany

4 Department of Medicine II, Heart Center, University Hospital Bonn, Bonn, Germany

5 Centre for Pharmacy Frankfurt/ZAFES, Institute for Pharmacology and Toxicology, University Hospital, Goethe University, Frankfurt, Germany

6 European Foundation for the Study of Chronic Liver Failure, Barcelona, Spain

7 Department of Medical Gastroenterology and Hepatology, Odense University Hospital, Odense, Denmark

8 Institute for Bioengineering of Catalonia, Barcelona, Spain

**Correspondence:**

Jonel Trebicka Department of Internal Medicine I, University Hospital, Goethe University, Frankfurt, Germany, Theodor-Stern-Kai 7, 60590 Frankfurt. jonel.trebicka@kgu.de, Tel: + 49 69 6301 4256

**Keywords:** ACLF, bacterial translocation, fibrosis, inflammation, NASH

**Running Title:** Mincle in chronic liver disease

**Supplemental data**

**
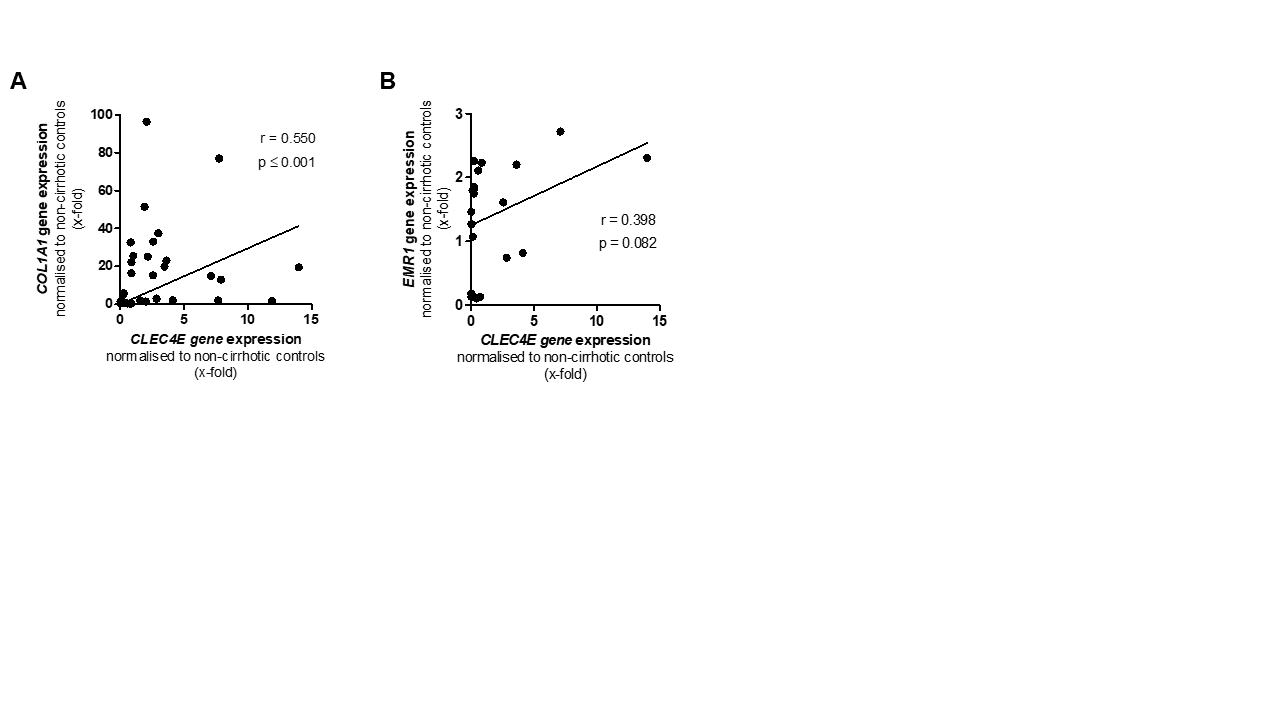
**

**Supplemental Figure 1:** (A) Correlation matrix of *COL1A1* and *CLEC4E* expression in humans with and without non-alcoholic steatohepatitis (NASH). (B) Correlation matrix of *EMR1* and *CLEC4E* expression in humans with and without non-alcoholic steatohepatitis (NASH).

**Supplemental Table 1: Taqman assays**

| Gene | Assay ID | Species |
| --- | --- | --- |
| *ACTA2* | Hs00426835_g1 | Human |
| *ADGRE1* | Hs00892591_m1 | Human |
| *CLEC4E* | Hs00372017_m1 | Human |
| *Clec4e* | Rn01492266_m1 | *Rattus norvegicus* |
| *COL1A1* | Hs00164004_m1 | Human |
| *Fcer1g* | Rn01411789_m1 | *Rattus norvegicus* |
| *Nfkb1* | Rn01399572_m1 | *Rattus norvegicus* |
